# Supplementary material for: Effects of Different Growth Stages of Amaranth Silage on the Rumen Degradation of Dairy Cows
Source: PubMed Central journal article supplement (PMC6826743; doi:10.3390/ani9100793), 2019-10-12
Supplement: animals-09-00793-s001.pdf [file animals-09-00793-s001.pdf]

# Effects of different growth stages of amaranth silage on the rumen degradation of dairy cows

Jian Ma<sup>1,3</sup>, Guoqing Sun<sup>1,2#</sup>, Ali Mujtaba Shah<sup>3,4</sup>, Xue Fan<sup>1</sup>, Shengli Li<sup>2\*</sup> and Xiong Yu<sup>1\*</sup>

<sup>1</sup> College of Animal Science, Xinjiang Agricultural University, Urumchi 100193, China; Crazyrna0411@163.com (J.M.); jackjeons123@163.com (G.S.); fanxue1205@163.com (X.F.)

<sup>2</sup> College of Animal Science, China Agricultural University, Beijing 830052, China;

<sup>3</sup> Animal Nutrition Institute, Sichuan Agricultural University, Chengdu 611130, China alimujtabashah@sbbuvas.edu.pk (A.M.S.)

<sup>4</sup> Department of Livestock Production, Shaheed Benazir Bhutto University of Veterinary and Animal Sciences, Sakrand 67210 Sindh Pakistan

\* Correspondence: lishengli@cau.edu.cn (S.L.); yuxiong8763601@126.com (X.Y.); Tel.: +86-10-13331168629 (S.L.); +86-991-15276763575 (X.Y.)

Jian Ma and Guoqing Sun contributed equally to this work

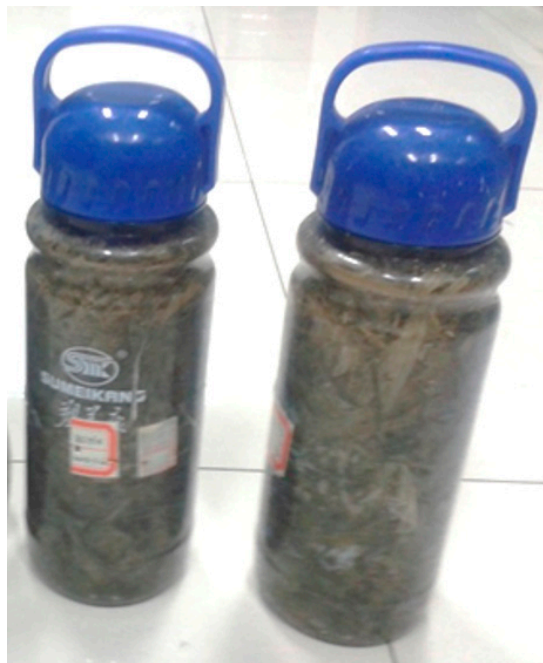

**Figure S1.** Fermentation container.
